# Supplementary material for: Aqueous bio-based hydrotropic solutions for green extraction of glycyrrhizic acid from licorice: experimental investigation and mechanistic insights
Source: Royal Society of Chemistry journal article supplement (doi:10.1039/d6ra02244h), 2026-04-21
Supplement: d6ra02244h1.pdf [file d6ra02244h1.pdf]

## **Aqueous Bio-Based Hydrotropic Solutions for Green Extraction of Glycyrrhizic Acid from Licorice: Experimental Investigation and Mechanistic Insights**

Nhan Trong Le,<sup>a</sup> Hang Thanh Thi Phan,<sup>a</sup> The-Huan Tran<sup>a</sup>, Hung The Nguyen,<sup>b</sup> and Hoai Thi Nguyen<sup>\*a</sup>

<sup>a</sup> Hue University of Medicine and Pharmacy, Hue University, Hue City, Vietnam.

<sup>b</sup> Hanoi University of Pharmacy, Hanoi City, Vietnam.

\* Correspondence: Hoai Thi Nguyen; e-mail: [nthoai@hueuni.edu.vn](mailto:nthoai@hueuni.edu.vn); Hue University of Medicine and Pharmacy, Hue University, Hue City, Vietnam.

### **Supplementary material contents**

- **Number of pages: 10**
- **Number of tables: 6**
- **Number of figures: 8**

**Table S1:** Independent variables and their coded levels in the BBD

| Independent variables       | Coded symbols | Coded levels |    |    |
|-----------------------------|---------------|--------------|----|----|
|                             |               | -1           | 0  | +1 |
| ABHS concentration (%)      | A             | 25           | 50 | 75 |
| Liquid-solid ratios (mL/g)  | B             | 20           | 35 | 50 |
| Extraction time (min)       | C             | 10           | 35 | 60 |
| Extraction temperature (°C) | D             | 30           | 50 | 70 |

**Table S2.** BBD results for the extraction yields of GA using PED ABHS

| <b>Run</b> | <b>A</b> | <b>B</b> | <b>C</b> | <b>D</b> | <b>Extraction efficiency (mg/g)</b> |
|------------|----------|----------|----------|----------|-------------------------------------|
| 1          | 50       | 20       | 35       | 70       | 69.86                               |
| 2          | 50       | 35       | 35       | 50       | 73.71                               |
| 3          | 50       | 35       | 60       | 30       | 71.62                               |
| 4          | 75       | 35       | 60       | 50       | 72.80                               |
| 5          | 50       | 35       | 10       | 70       | 76.01                               |
| 6          | 50       | 20       | 60       | 50       | 67.51                               |
| 7          | 25       | 35       | 60       | 50       | 71.99                               |
| 8          | 50       | 50       | 35       | 70       | 78.30                               |
| 9          | 25       | 35       | 35       | 30       | 70.82                               |
| 10         | 25       | 50       | 35       | 50       | 75.16                               |
| 11         | 75       | 35       | 10       | 50       | 72.21                               |
| 12         | 75       | 50       | 35       | 50       | 76.86                               |
| 13         | 50       | 20       | 10       | 50       | 66.08                               |
| 14         | 75       | 35       | 35       | 30       | 70.96                               |
| 15         | 75       | 35       | 35       | 70       | 74.92                               |
| 16         | 75       | 20       | 35       | 50       | 68.13                               |
| 17         | 50       | 50       | 10       | 50       | 75.32                               |
| 18         | 50       | 20       | 35       | 30       | 65.74                               |
| 19         | 25       | 20       | 35       | 50       | 66.95                               |
| 20         | 50       | 35       | 35       | 50       | 72.60                               |
| 21         | 50       | 35       | 35       | 50       | 72.25                               |
| 22         | 50       | 50       | 35       | 30       | 74.44                               |
| 23         | 50       | 35       | 35       | 50       | 72.10                               |
| 24         | 50       | 35       | 10       | 30       | 68.17                               |
| 25         | 50       | 50       | 60       | 50       | 74.53                               |
| 26         | 50       | 35       | 35       | 50       | 72.35                               |
| 27         | 25       | 35       | 35       | 70       | 74.32                               |
| 28         | 50       | 35       | 60       | 70       | 72.66                               |
| 29         | 25       | 35       | 10       | 50       | 70.69                               |

**A:** ABHS concentration, **B:** liquid-solid ratio, **C:** extraction time, and **D:** extraction temperature

**Table S3.** ANOVA results for GA extraction using the PED ABHS

| Source         | Sum of Squares | df | Mean Square | F-value | p-value  |                 |
|----------------|----------------|----|-------------|---------|----------|-----------------|
| Model          | 286.44         | 14 | 20.46       | 88.67   | < 0.0001 | significant     |
| A              | 2.95           | 1  | 2.95        | 12.80   | 0.0030   |                 |
| B              | 211.16         | 1  | 211.16      | 915.16  | < 0.0001 |                 |
| C              | 0.5728         | 1  | 0.5728      | 2.48    | 0.1374   |                 |
| D              | 49.28          | 1  | 49.28       | 213.59  | < 0.0001 |                 |
| AB             | 0.0682         | 1  | 0.0682      | 0.2954  | 0.5953   |                 |
| AC             | 0.1253         | 1  | 0.1253      | 0.5428  | 0.4734   |                 |
| AD             | 0.0511         | 1  | 0.0511      | 0.2213  | 0.6453   |                 |
| BC             | 1.23           | 1  | 1.23        | 5.34    | 0.0365   |                 |
| BD             | 0.0170         | 1  | 0.0170      | 0.0735  | 0.7903   |                 |
| CD             | 11.58          | 1  | 11.58       | 50.19   | < 0.0001 |                 |
| A <sup>2</sup> | 0.0002         | 1  | 0.0002      | 0.0008  | 0.9783   |                 |
| B <sup>2</sup> | 4.78           | 1  | 4.78        | 20.72   | 0.0005   |                 |
| C <sup>2</sup> | 3.87           | 1  | 3.87        | 16.75   | 0.0011   |                 |
| D <sup>2</sup> | 0.4329         | 1  | 0.4329      | 1.88    | 0.1923   |                 |
| Residual       | 3.23           | 14 | 0.2307      |         |          |                 |
| Lack of Fit    | 1.57           | 10 | 0.1571      | 0.3789  | 0.9028   | not significant |
| Pure Error     | 1.66           | 4  | 0.4147      |         |          |                 |
| Cor Total      | 289.67         | 28 |             |         |          |                 |

$R^2 = 0.9888$        $R^2 \text{ adj} = 0.9777$        $R^2 \text{ pred} = 0.9598$

**A:** ABHS concentration, **B:** liquid-solid ratio, **C:** extraction time, and **D:** extraction temperature

**Table S4.** The relative deviations between the experimental results and model predictions in the trials of extracting GA from Licorice using PED ABHS

| Run | A | B | C | D | Extraction yield (mg/g) | Relative deviation |
|-----|---|---|---|---|-------------------------|--------------------|
|-----|---|---|---|---|-------------------------|--------------------|

|    |    |    |    |    | <b>Experimental</b> | <b>Predicted</b> | <b>(%)</b> |
|----|----|----|----|----|---------------------|------------------|------------|
| 1  | 50 | 20 | 35 | 70 | 69.86               | 69.90            | -0.06      |
| 2  | 50 | 35 | 35 | 50 | 73.71               | 72.60            | 1.53       |
| 3  | 50 | 35 | 60 | 30 | 71.62               | 71.98            | -0.50      |
| 4  | 75 | 35 | 60 | 50 | 72.80               | 72.37            | 0.59       |
| 5  | 50 | 35 | 10 | 70 | 76.01               | 75.60            | 0.54       |
| 6  | 50 | 20 | 60 | 50 | 67.51               | 67.55            | -0.06      |
| 7  | 25 | 35 | 60 | 50 | 71.99               | 71.74            | 0.35       |
| 8  | 50 | 50 | 35 | 70 | 78.30               | 78.16            | 0.18       |
| 9  | 25 | 35 | 35 | 30 | 70.82               | 70.46            | 0.51       |
| 10 | 25 | 50 | 35 | 50 | 75.16               | 75.32            | -0.21      |
| 11 | 75 | 35 | 10 | 50 | 72.21               | 72.29            | -0.11      |
| 12 | 75 | 50 | 35 | 50 | 76.86               | 76.57            | 0.38       |
| 13 | 50 | 20 | 10 | 50 | 66.08               | 66.00            | 0.12       |
| 14 | 75 | 35 | 35 | 30 | 70.96               | 71.22            | -0.37      |
| 15 | 75 | 35 | 35 | 70 | 74.92               | 75.50            | -0.77      |
| 16 | 75 | 20 | 35 | 50 | 68.13               | 67.92            | 0.31       |
| 17 | 50 | 50 | 10 | 50 | 75.32               | 75.50            | -0.24      |
| 18 | 50 | 20 | 35 | 30 | 65.74               | 65.72            | 0.03       |
| 19 | 25 | 20 | 35 | 50 | 66.95               | 67.19            | -0.36      |
| 20 | 50 | 35 | 35 | 50 | 72.60               | 72.60            | 0.00       |
| 21 | 50 | 35 | 35 | 50 | 72.25               | 72.60            | -0.48      |
| 22 | 50 | 50 | 35 | 30 | 74.44               | 74.24            | 0.27       |
| 23 | 50 | 35 | 35 | 50 | 72.10               | 72.60            | -0.69      |
| 24 | 50 | 35 | 10 | 30 | 68.17               | 68.14            | 0.04       |
| 25 | 50 | 50 | 60 | 50 | 74.53               | 74.83            | -0.40      |
| 26 | 50 | 35 | 35 | 50 | 72.35               | 72.60            | -0.34      |
| 27 | 25 | 35 | 35 | 70 | 74.32               | 74.28            | 0.05       |
| 28 | 50 | 35 | 60 | 70 | 72.66               | 72.63            | 0.04       |
| 29 | 25 | 35 | 10 | 50 | 70.69               | 70.94            | -0.35      |

**A:** ABHS concentration, **B:** liquid-solid ratio, **C:** extraction time, and **D:** extraction temperature

**Table S5.** Abbreviations, compositions, and extraction conditions of solvents employed for the comparative evaluation of GA extraction from Licorice.

| No. | Abbreviation | Composition of solvent                                 | Extraction conditions                            | Ref. |
|-----|--------------|--------------------------------------------------------|--------------------------------------------------|------|
| 1   | DESSs-1      | Glycerol-ammonium acetate (3:1 mol/mol), C = 50%       | L/S ratio 24 mL/g, 25 min, 80 °C, HAE            | 1    |
| 2   | DESSs-2      | Glycerol-ammonium acetate (3:1 mol/mol), C = 50%       | L/S ratio 24 mL/g, 79 min, 60 °C, UAE            | 1    |
| 3   | DESSs-3      | Glycerol-choline chloride (3:1 mol/mol), C = 50%       | L/S ratio 24 mL/g, 65 min, 80 °C, HAE            | 1    |
| 4   | DESSs-4      | Glycerol-choline chloride (3:1 mol/mol), C = 50%       | L/S ratio 24 mL/g, 25 min, 80 °C, UAE            | 1    |
| 5   | DESSs-5      | Choline chloride-lactic acid (1:1 mol/mol), C = 70%    | L/S ratio 40 mL/g, 30 min, 40 °C, HAE            | 2    |
| 6   | DESSs-6      | Choline chloride-lactic acid (1:1 mol/mol), C = 70%    | L/S ratio 30 mL/g, 15 min, room temperature, UAE | 3    |
| 7   | DESSs-7      | Choline chloride-1,3-butanediol (1:4 mol/mol), C = 70% | L/S ratio 20 mL/g, 41 min, 50 °C, UAE            | 4    |
| 8   | DESSs-8      | 1,4-butanediol-levulinic acid (1:3 mol/mol), C = 83%   | L/S ratio 42 mL/g, 30 min, room temperature, UAE | 5    |

L/S ratio: the liquid-solid ratio; UAE: ultrasound-assisted extraction; HAE: heat-assisted extraction

**Table S6:** Chemical composition of the GA-enriched extract obtained from Licorice using ABHS

| No | RT (min) | Identification     | Elemental composition                           | Proposed ions      | Experimental mass m/z | Theoretical mass m/z | Mass error (ppm) |
|----|----------|--------------------|-------------------------------------------------|--------------------|-----------------------|----------------------|------------------|
| 1  | 7.70     | Liquiritigenin     | C <sub>15</sub> H <sub>12</sub> O <sub>4</sub>  | [M-H] <sup>-</sup> | 255.0653              | 255.0658             | 1.7990           |
| 2  | 7.70     | Liquiritin         | C <sub>21</sub> H <sub>22</sub> O <sub>9</sub>  | [M-H] <sup>-</sup> | 417.1168              | 417.1186             | 4.2728           |
| 3  | 8.92     | Isoliquiritin      | C <sub>21</sub> H <sub>22</sub> O <sub>9</sub>  | [M-H] <sup>-</sup> | 417.1173              | 417.1186             | 3.0741           |
| 4  | 9.03     | Isoliquiritigenin  | C <sub>15</sub> H <sub>12</sub> O <sub>4</sub>  | [M-H] <sup>-</sup> | 255.0656              | 255.0658             | 0.6234           |
| 5  | 10.30    | Echinatin          | C <sub>16</sub> H <sub>14</sub> O <sub>4</sub>  | [M-H] <sup>-</sup> | 269.0814              | 269.0814             | 0.0331           |
| 6  | 11.15    | Formononetin       | C <sub>16</sub> H <sub>12</sub> O <sub>4</sub>  | [M-H] <sup>-</sup> | 267.0659              | 267.0658             | 0.5285           |
| 7  | 11.22    | Glycyrrhizic acid  | C <sub>42</sub> H <sub>62</sub> O <sub>16</sub> | [M-H] <sup>-</sup> | 821.3975              | 821.3960             | 1.8262           |
| 8  | 12.41    | Licoisoflavanone   | C <sub>20</sub> H <sub>18</sub> O <sub>6</sub>  | [M-H] <sup>-</sup> | 353.1018              | 353.1025             | 2.0909           |
| 9  | 12.49    | Glycycoumarin      | C <sub>21</sub> H <sub>20</sub> O <sub>6</sub>  | [M-H] <sup>-</sup> | 367.1168              | 367.1182             | 3.7818           |
| 10 | 12.78    | Glabrene           | C <sub>20</sub> H <sub>18</sub> O <sub>4</sub>  | [M-H] <sup>-</sup> | 321.1120              | 321.1127             | 2.2081           |
| 11 | 13.35    | Glycyrol           | C <sub>21</sub> H <sub>18</sub> O <sub>6</sub>  | [M-H] <sup>-</sup> | 365.1022              | 365.1022             | 0.0000           |
| 12 | 13.71    | Glabridin          | C <sub>20</sub> H <sub>20</sub> O <sub>4</sub>  | [M-H] <sup>-</sup> | 323.1276              | 323.1284             | 2.3493           |
| 13 | 13.77    | Glycyrrhisoflavone | C <sub>20</sub> H <sub>18</sub> O <sub>6</sub>  | [M-H] <sup>-</sup> | 353.1022              | 353.1025             | 0.9581           |
| 14 | 14.35    | Glabrone           | C <sub>20</sub> H <sub>16</sub> O <sub>5</sub>  | [M-H] <sup>-</sup> | 335.0915              | 335.092              | 1.4134           |
| 15 | 14.40    | Glabrol            | C <sub>25</sub> H <sub>28</sub> O <sub>4</sub>  | [M-H] <sup>-</sup> | 391.1891              | 391.1910             | 4.7531           |
| 16 | 14.97    | 3-Hydroxyglabrol   | C <sub>25</sub> H <sub>28</sub> O <sub>5</sub>  | [M-H] <sup>-</sup> | 407.1841              | 407.1859             | 4.3567           |
| 17 | 15.92    | Licocoumarin A     | C <sub>25</sub> H <sub>26</sub> O <sub>5</sub>  | [M-H] <sup>-</sup> | 405.1689              | 405.1702             | 3.2676           |

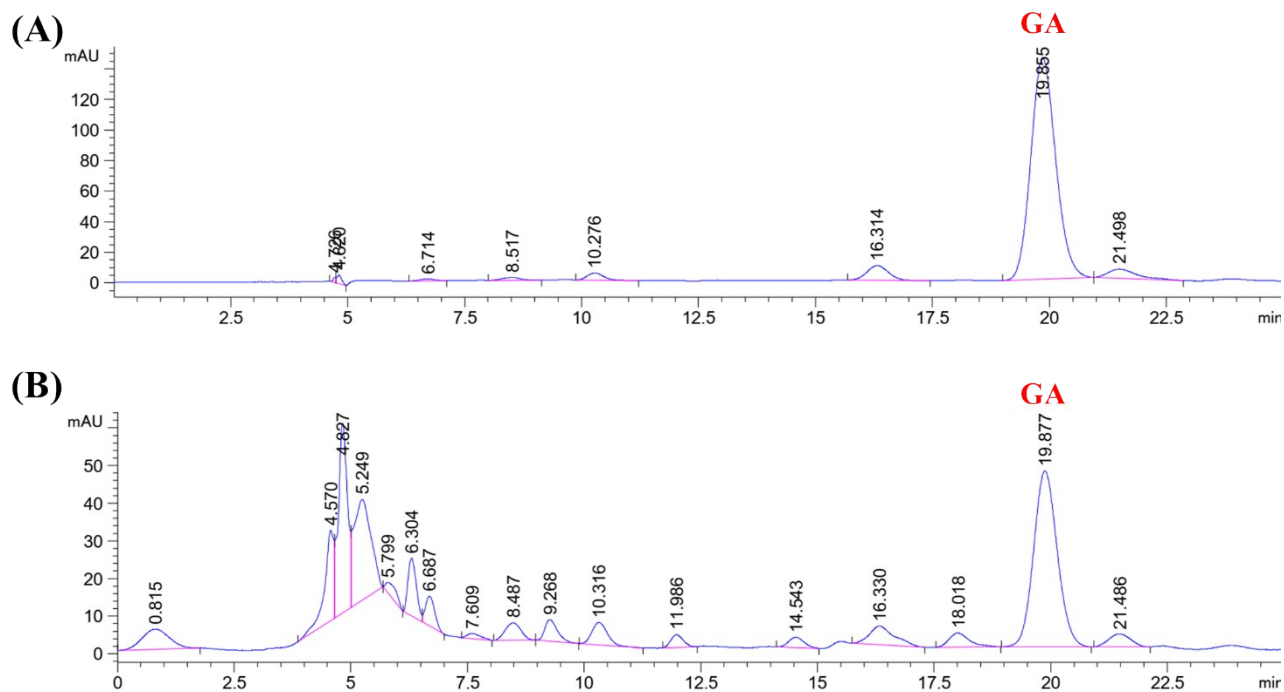

**Figure S1.** HPLC chromatograms for identification of GA at 254 nm. (A) reference standard (GA) and (B) Licorice extract.

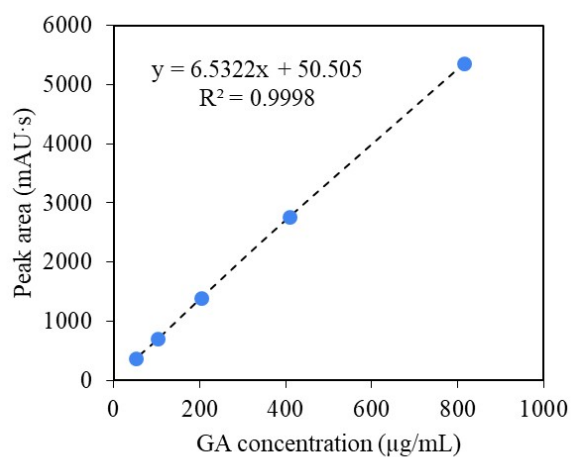

**Figure S2.** Calibration curve of GA showing the relationship between peak area and concentration ( $R^2 = 0.9998$ ).

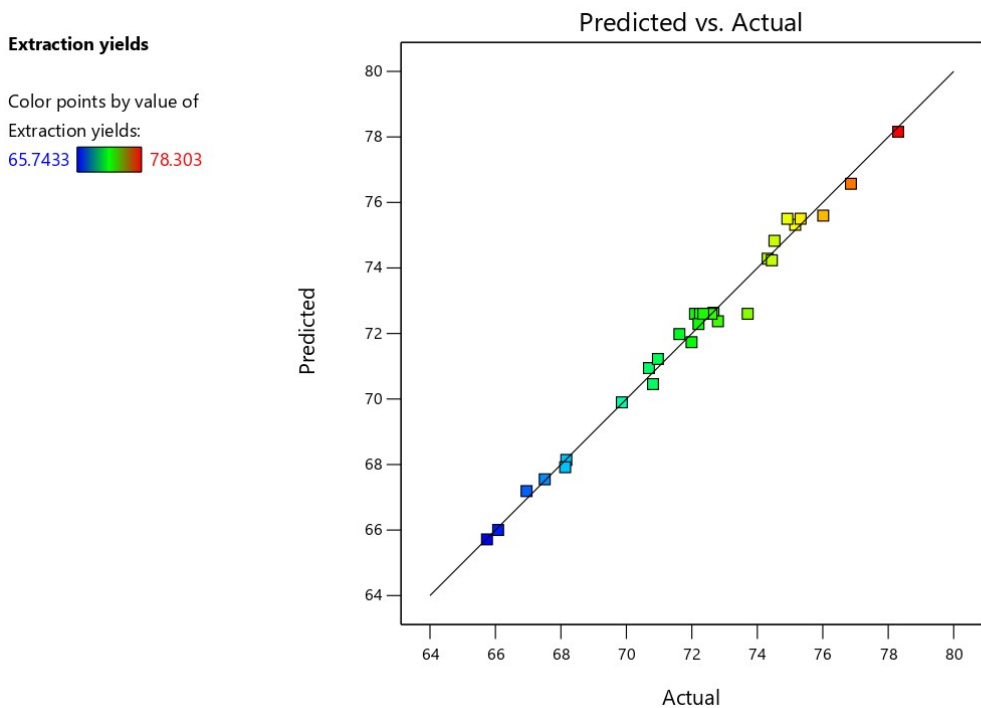

**Figure S3.** Plot of predicted versus observed values for GA extraction from Licorice using PED ABHS.

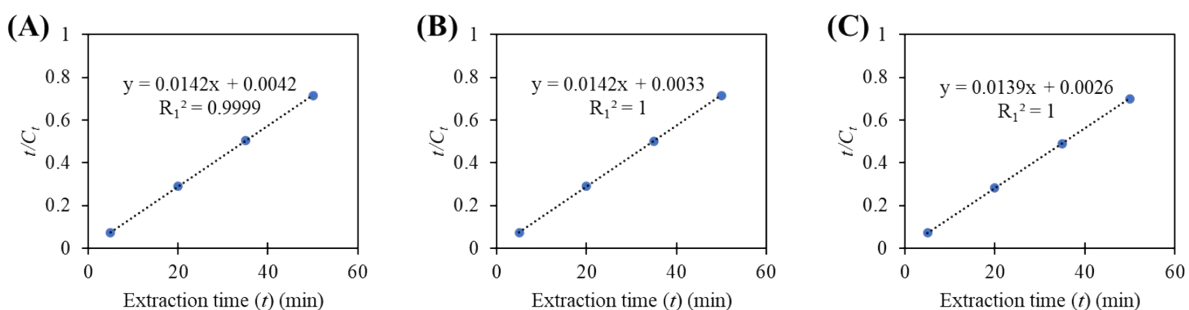

**Figure S4:** Second-order kinetic models for the GA extraction from Licorice using PED ABHS at different temperatures: A (40°C), B (50°C), and C (60°C).

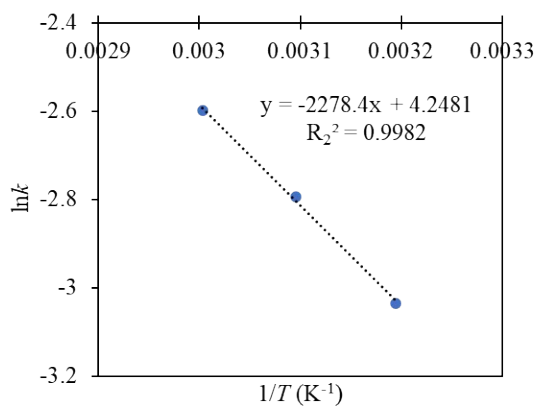

**Figure S5:** The Arrhenius plot of the second-order kinetic models for GA extraction from Licorice using PED ABHS.

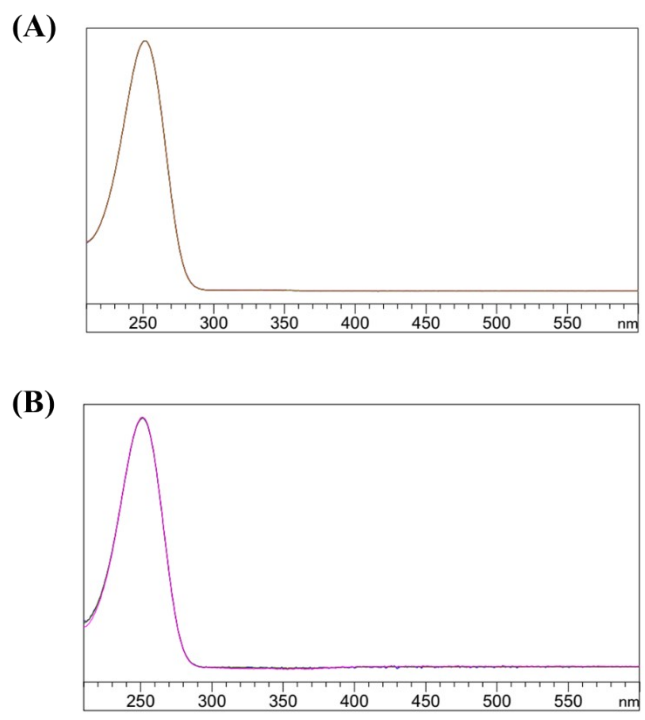

Figure S6. UV spectra GA standard (A) and ABHS-extracted GA (B).

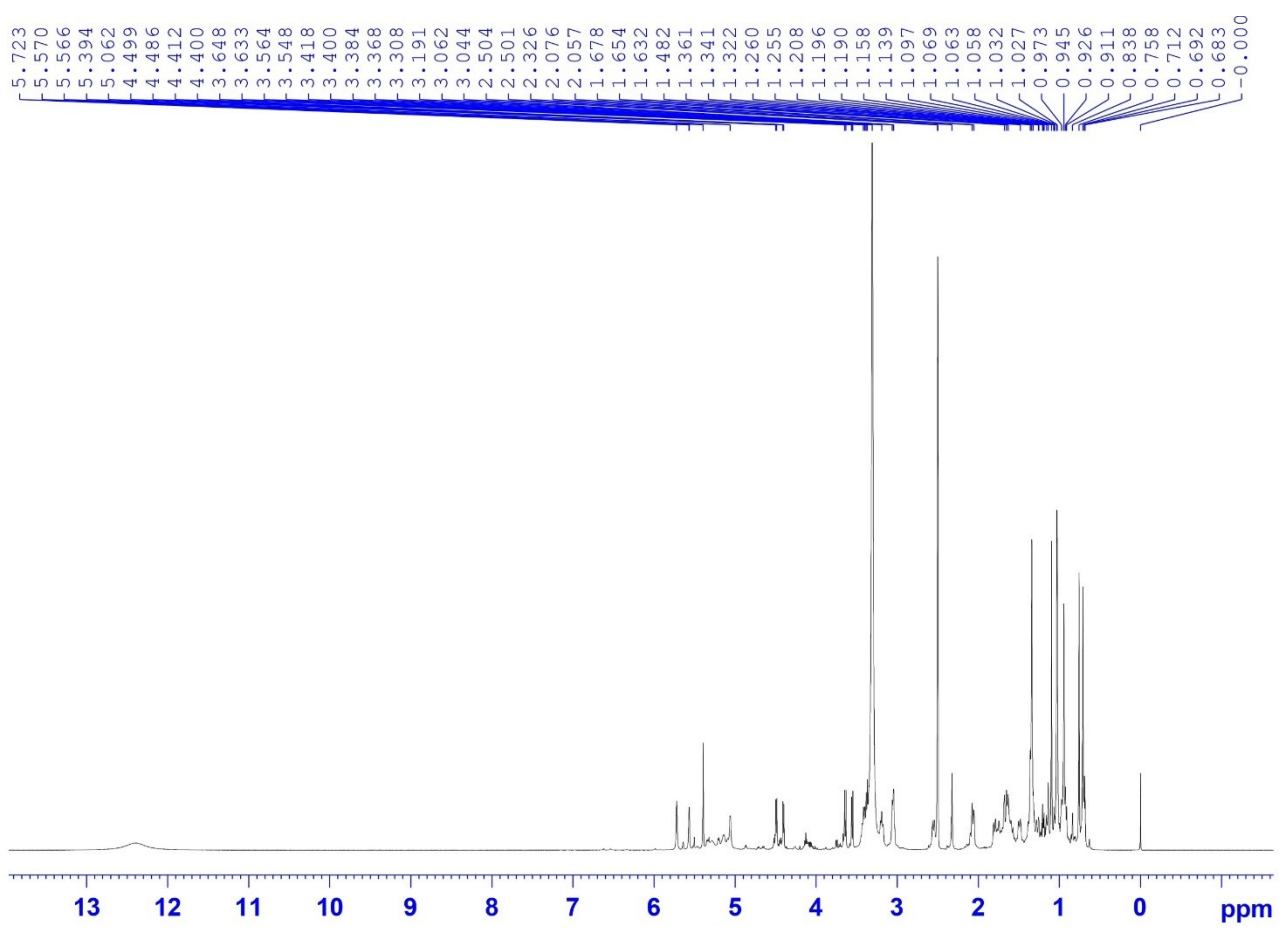

Figure S7. <sup>1</sup>H NMR spectra of standard GA.

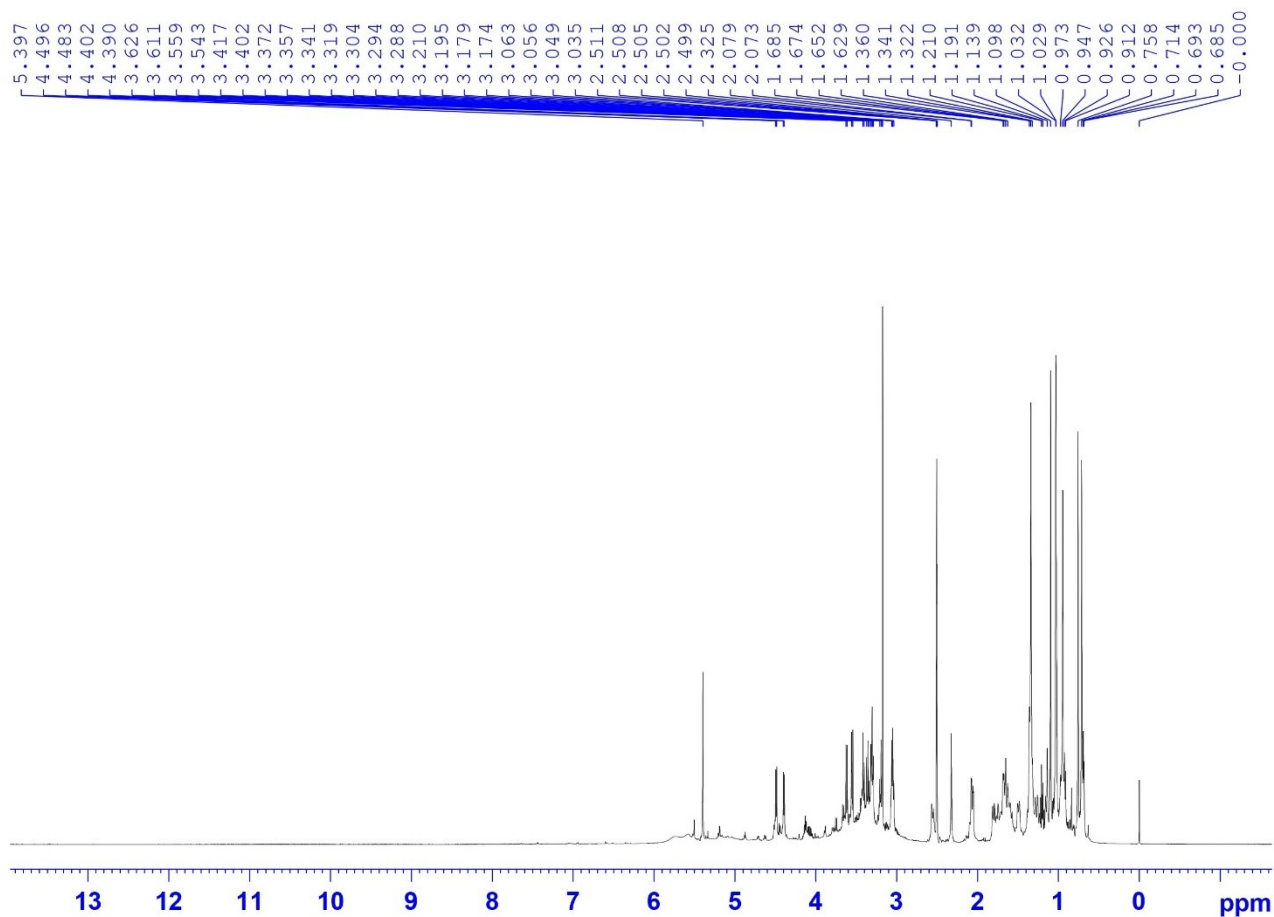

Figure S8.  $^1\text{H}$  NMR spectra of ABHS-extracted GA

## References

- 1 K. tul Kubra, D. Ahmed, A. Y. Aydar and M. T. Qamar, *Sustain. Chem. Pharm.*, 2023, **31**, 100910.
- 2 K. J. Lanjekar and V. K. Rathod, *Process Biochem.*, 2021, **102**, 22–32.
- 3 K. J. Lanjekar and V. K. Rathod, *Ind. Eng. Chem. Res.*, 2021, **60**, 9532–9538.
- 4 P. Yu, Q. Li, Y. Feng, S. Ma, Y. Chen and G. Li, *Molecules*, 2021, **26**, 1310.
- 5 J. Dong, G. Wu, Z. Dong, D. Yang, Y. Bo, M. An and L. Zhao, *RSC Adv.*, 2021, **11**, 37649–37660.
